# Supplementary material for: Elastin molecular aging promotes MDA‐MB‐231 breast cancer cell invasiveness
Source: PubMed Central journal article supplement (PMC6120250; doi:10.1002/2211-5463.12455), 2018-08-02
Supplement: FEB4-8-1395-s001.pdf [file FEB4-8-1395-s001.pdf]

**Figure S1.** Influence of EDPs on MDA-MB-231 cancer cells adhesion.

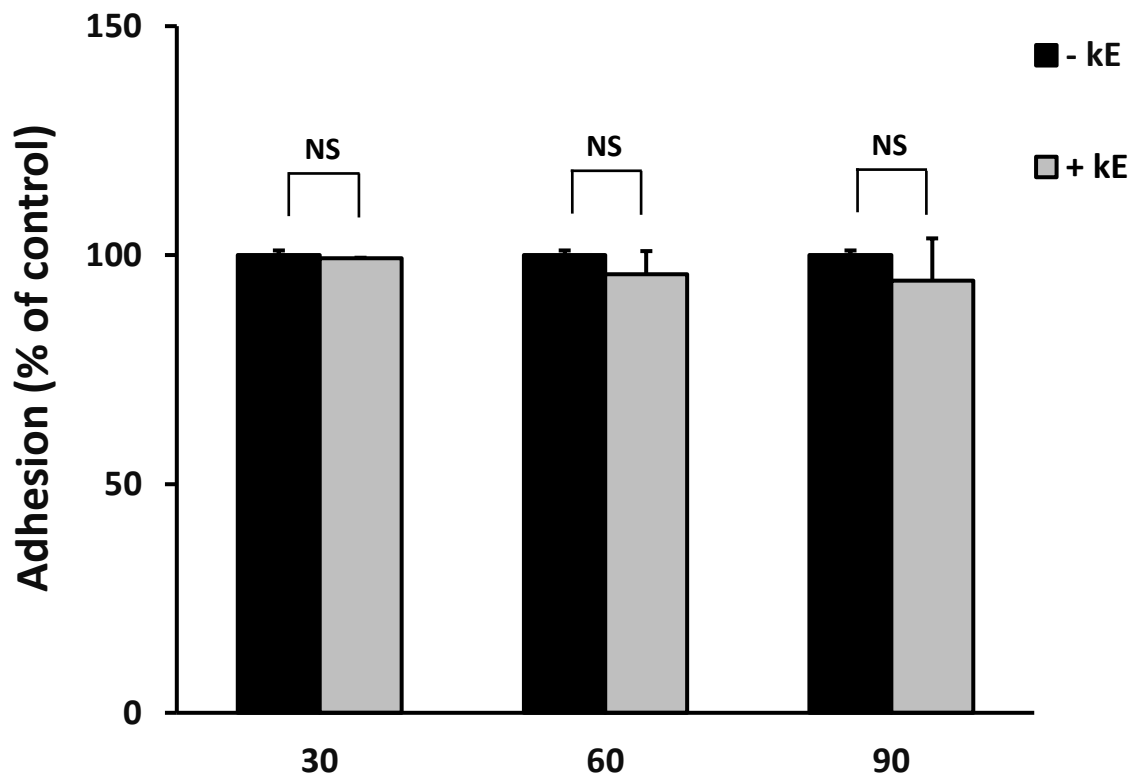

The capacity of MDA-MB-231 cells to adhere onto gelatin in the presence or absence of kE (50  $\mu\text{g/ml}$ ) has been evaluated for 30, 60 and 90 min. Adhering cells were then fixed and colored using Violet Crystal. Adhesion of treated cells is expressed as a percentage of the corresponding control without kE. The presented histogram was established from 2 independent series of experiments (n=2). NS, not significant.

As observed, the treatment of cells with kE does not change their ability to adhere onto gelatin. We therefore concluded that EDPs had no effect on MDA-MB-231 cells adhesion.
