# Supplementary material for: Elastin molecular aging promotes MDA‐MB‐231 breast cancer cell invasiveness
Source: PubMed Central journal article supplement (PMC6120250; doi:10.1002/2211-5463.12455), 2018-08-02
Supplement: FEB4-8-1395-s003.pdf [file FEB4-8-1395-s003.pdf]

**Figure S3.** Effect of EDPs on MDA-MB-231 cells migration

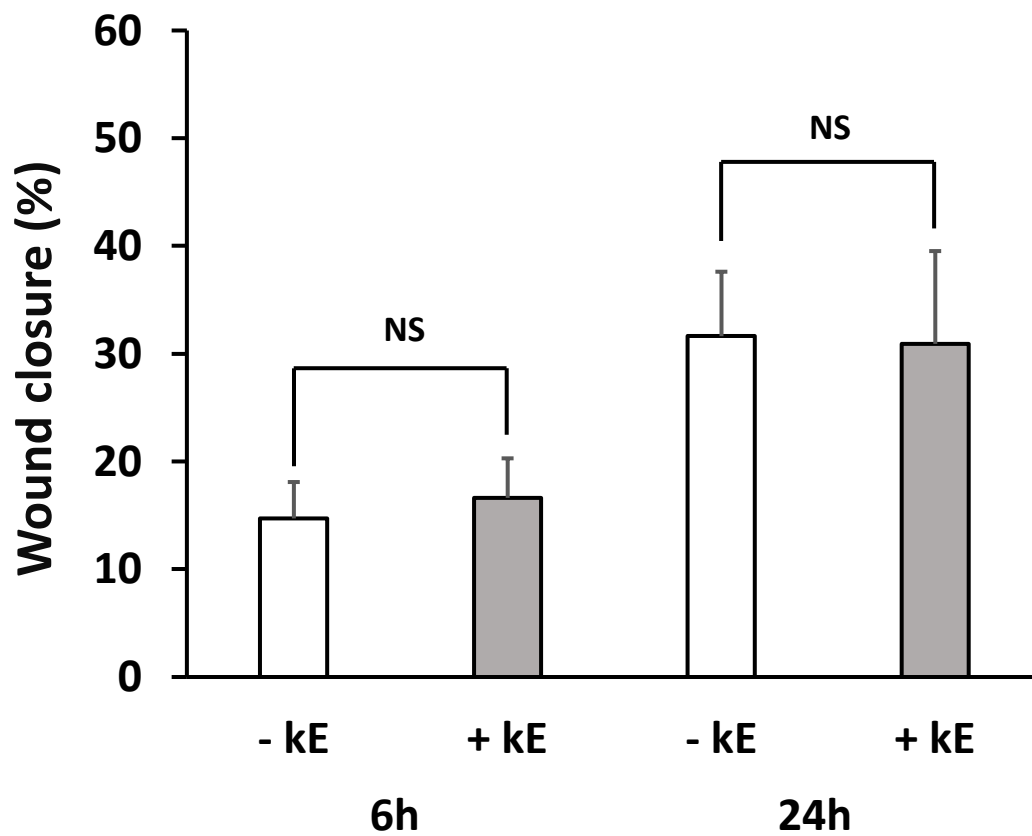

Cell migration was evaluated using a classic scratch wound assay. A wound was made in MDA-MB-231 cell layer and migration was allowed in a medium containing either nothing or kE (50  $\mu\text{g/ml}$ ). The area of the wound was measured at the corresponding times using the wound healing tool implemented in the ImageJ software. The results are expressed as a percentage of wound closure ( $n=3$ ). NS, not significant.

As observed, the presence of EDPs had no impact on the capacity of MDA-MB-231 to close the wound. We therefore concluded that EDPs did not influence MDA-MB-231 cells migration.
